# Supplementary material for: Direct NMR evidence for Ca2+ ion binding to G-quartets
Source: Royal Society of Chemistry journal article supplement (doi:10.1039/b714803h), 2007-11-08
Supplement: b714803h.pdf [file b714803h.pdf]

Supporting Information

**Direct NMR evidence for Ca<sup>2+</sup> ion binding to G-quartets**

Irene C. M. Kwan,<sup>1</sup> Alan Wong,<sup>2</sup> Yi-Min She,<sup>1</sup> Mark Smith,<sup>2</sup> and Gang Wu<sup>1\*</sup>

<sup>1</sup>Department of Chemistry, Queen's University, Kingston, Ontario Canada K7L 3N6

<sup>2</sup>Department of Physics, University of Warwick, Coventry CV4 7AL, UK.

\*Corresponding author : e-mail: [gang.wu@chem.queensu.ca](mailto:gang.wu@chem.queensu.ca); FAX : 613 533 6669

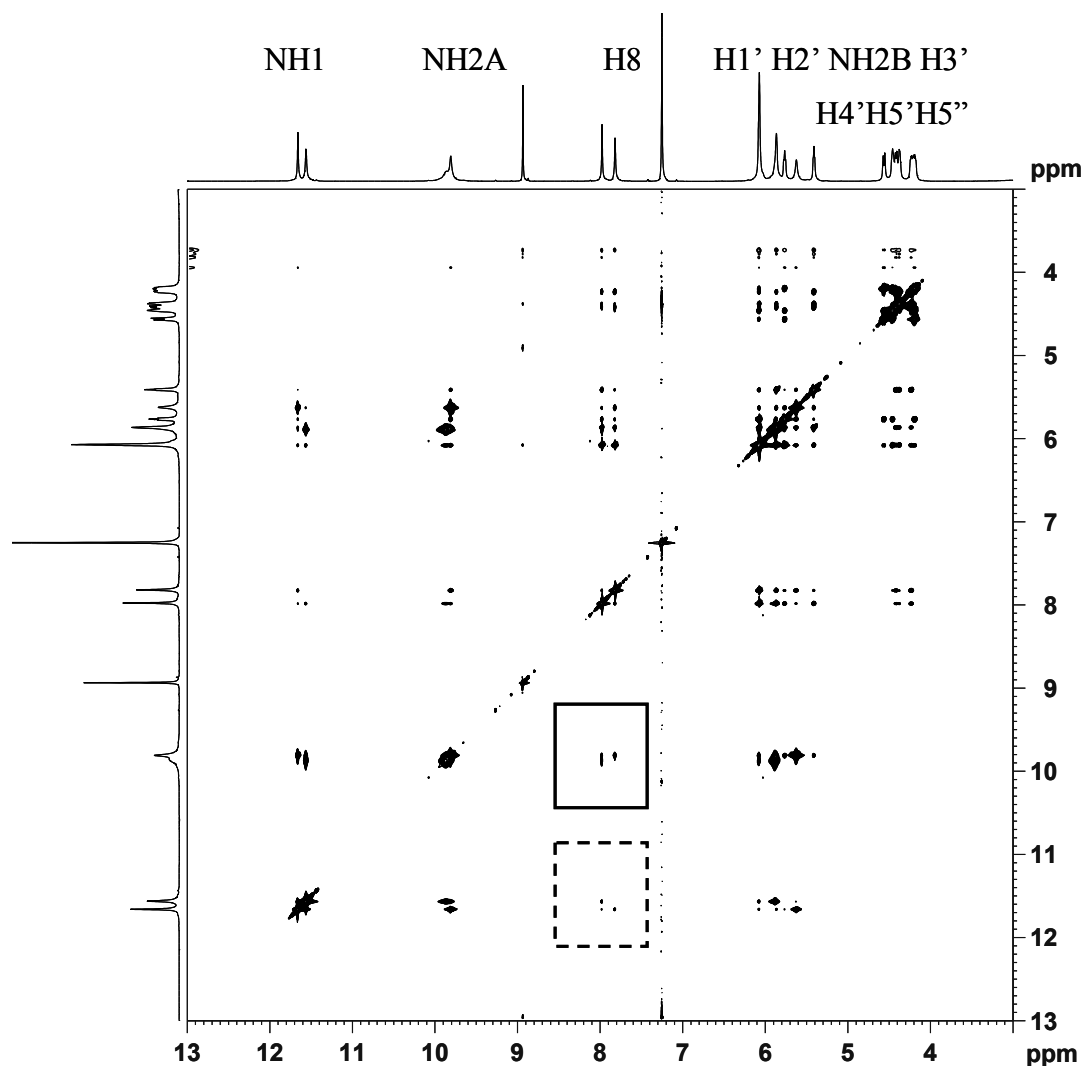

Figure 1S. 600-MHz <sup>1</sup>H NOESY spectrum of the TAG-Ca<sup>2+</sup> complex in CDCl<sub>3</sub> at 268 K. Cross peaks formed between NH2A and H8 were highlighted in the solid box while those formed between NH1 and H8 were enclosed in the dashed box.

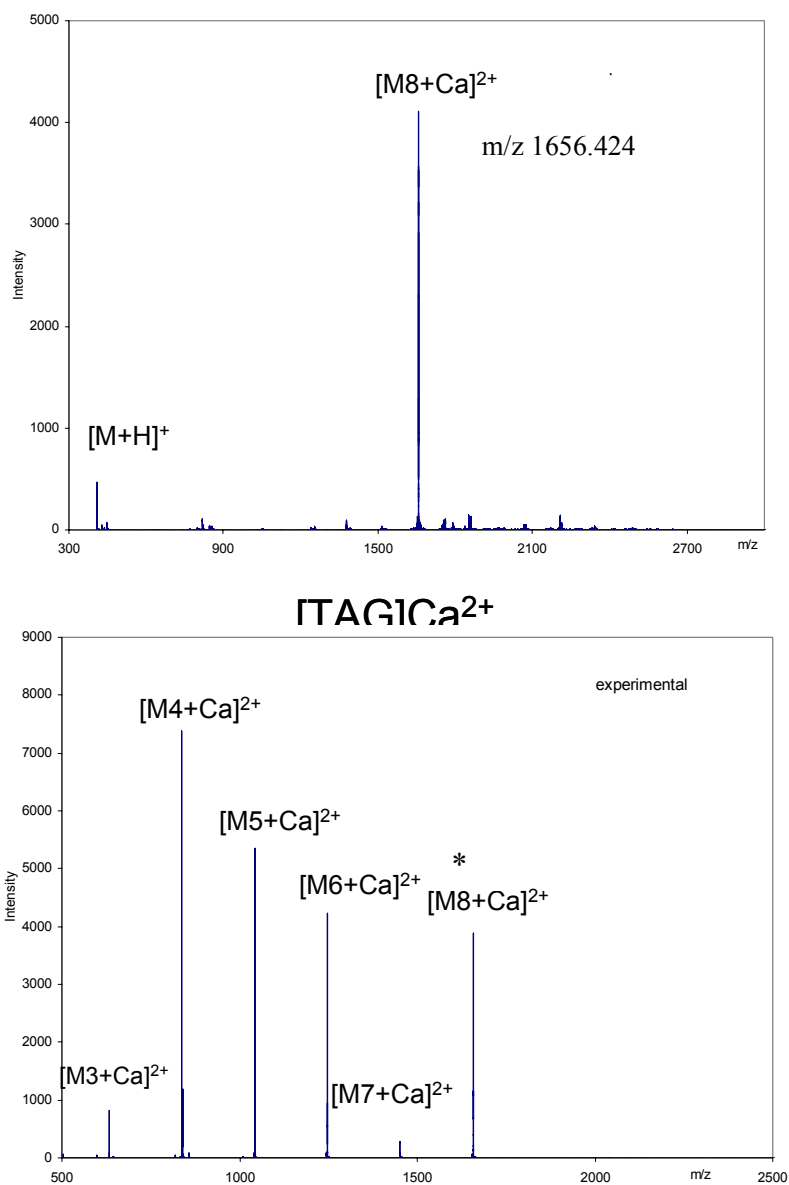

Figure 2S. (Top) ESI MS spectrum and (Bottom) ESI MS/MS (\* parent ion,  $m/z$  1656.424) spectrum of the TAG- $Ca^{2+}$  complex. ESI MS spectra were recorded with an Applied Biosystems QSTAR XL quadrupole time-of-flight (QqTOF) mass spectrometer using the positive mode. ESI-MS data were acquired using the Analyst QS 1.1 software. Samples were dissolved in anhydrous nitromethane ( $CH_3NO_2$ ) and injected with a syringe pump at a flow rate of 5.0  $\mu$ L/min. The mass range of single MS measurements was set at  $m/z$  300 to 6000. The declustering potential (DP) was set to 20 V during the MS experiment. Subsequent tandem mass spectrometry (MS/MS) measurements were performed using nitrogen as the collision gas. Collision induced dissociation (CID) energy of 35 eV was applied to break down the G dodecamers and G octamers. The mass range of MS/MS measurements was set at  $m/z$  100 to 4000. For spectral assignment, theoretical MS peaks were generated using Data Explorer v. 4.0.0.0 (1997–2000) by Applied Biosystems.
